# Supplementary material for: Effects of High Forage/Concentrate Diet on Volatile Fatty Acid Production and the Microorganisms Involved in VFA Production in Cow Rumen
Source: PubMed Central journal article supplement (PMC7070707; doi:10.3390/ani10020223), 2020-01-30
Supplement: animals-10-00223-s001.pdf [file animals-10-00223-s001.pdf]

# Effects of High Forage/Concentrate Diet on Volatile Fatty Acid Production and the Microorganisms Involved in VFA Production in Cow Rumen

Lijun Wang<sup>1,2</sup>, Guangning Zhang<sup>2</sup>, Yang Li<sup>2</sup> and Yonggen Zhang<sup>2\*</sup>

<sup>1</sup>College of Animal Science and Technology, Qingdao agricultural university, No. 700 of Changcheng Road, Qingdao, Shandong Province 266000, China; wlj880626@163

<sup>2</sup>College of Animal Science and Technology, Northeast Agricultural University, No. 600 of Changjiang Road, Harbin, Heilongjiang Province 150030, China; zgn1234@126.com ; liyang1405053@sina.com;

\* Correspondence: zhangyonggen409@126.com; Tel) +86-451-55190840, Fax) +86-451-55190840.

**Table S1 Ingredient compositions and nutrition levels of diets (% of DM)**

| Ingredients, % of DM             | Dietary frage-to-concentrate ration (F:C) (% of DM) |            |
|----------------------------------|-----------------------------------------------------|------------|
|                                  | 70:30 (F:C)                                         | 35:65(F:C) |
| Corn silage                      | 25.39                                               | 12.82      |
| Alfalfa hay                      | 0                                                   | 11.19      |
| Chinese wildrye                  | 47.91                                               | 11.09      |
| DDGS <sup>1</sup>                | 7.30                                                | 0          |
| Corn bran                        | 8.08                                                | 6.64       |
| Cottonseed meal                  | 0                                                   | 5.82       |
| Soybean meal                     | 4.74                                                | 13.49      |
| Corn starch                      | 0                                                   | 11.09      |
| Steam flaked corn                | 0                                                   | 15.23      |
| Soybean hull                     | 0                                                   | 6.07       |
| Cottonseed                       | 0                                                   | 6.04       |
| Concentrates <sup>2</sup>        | 6.23                                                | 0          |
| Premix <sup>3</sup>              | 0.26                                                | 0.55       |
| Total                            | 100                                                 | 100        |
| <b>Nutrient contens of diets</b> |                                                     |            |
| CP <sup>1</sup> , % of DM        | 13.92                                               | 18.19      |
| NDF <sup>1</sup> , % of DM       | 52.43                                               | 37.10      |
| ADF <sup>1</sup> , % of DM       | 27.51                                               | 21.44      |
| NFC <sup>1</sup> , % of DM       | 28.89                                               | 37.73      |
| Starch, % of DM                  | 8.94                                                | 22.26      |
| Ca, % of DM                      | 0.64                                                | 0.65       |
| P, % of DM                       | 0.36                                                | 0.43       |
| NEI, MCal/kg                     | 1.50                                                | 1.81       |

<sup>1</sup> DDGS= Distillers Dried Grains with Solubles; CP = crud protein; NDF = neutral detergent fiber; ADF = Acid detergent fiber; NFC= non fibrous carbohydrates

<sup>2</sup> Concentrates: (% of DM) CP 34.00% , NPN (nonprotein nitrogen) 7.36% , NDF 15.22% , ANF 6.15% ,

EE(ether extract)7.2%, NFC 36.13%, Ash 8.42%,

<sup>3</sup>Premix: water 9.34%, Ca 3.22%, P 0.83%, Mg 0.69%, K 1.01%, S 0.31%, Na 1.84%, Cl 2.25%, Fe 112.00 mg/kg DM, Zn 700.00 mg/kg DM, Cu 140.00 mg/kg DM, Mn 653.34mg/kg DM, I 9.33 mg/kg DM, Se 3.08 mg/kg DM, Co 9.35 mg/kg DM, Vitamin A 106,720 IU/ kg DM, Vitamin D 13,280 IU/kg DM, Vitamin E 320 mg /kg DM.

**Table S2 Primers used for real-time PCR quantification**

| Target bacteria                  | Primer                                 | Tm (°C) | Product size(bp) | Reference  |
|----------------------------------|----------------------------------------|---------|------------------|------------|
| General Bacteria                 | F: 5'- CGGCAACGAGCGCAACCC -3'          | 58      | 130              | [1]        |
| 16Sr DNA                         | R: 5'-CCATTGTAGCACGTGTGTAGCC -3'       |         |                  |            |
| <i>Ruminococcus albus</i>        | F: 5'-CCCTAAAAGCAGTCTTAGTTCG-3'        | 54      | 176              | [2]        |
|                                  | R: 5'-CCTCCTTGCGGTTAGAACA-3'           |         |                  |            |
| <i>Ruminococcus flavefaciens</i> | F: 5'-CGAACGGAGATAATTTGAGTTTACTTAGG-3' | 58      | 132              | [2]        |
|                                  | R: 5'-CGGTCTCTGTATGTTATGAGGTATTACC-3'  |         |                  |            |
| <i>Fibrobacter succinogenes</i>  | F: 5'-GGAGCGTAGGCGGAGATTCA-3'          | 59      | 97               | [2]        |
|                                  | R: 5'-GCCTGCCCCTGAACTATCCA-3'          |         |                  |            |
| <i>Butyrivibrio fibrisolvens</i> | F: 5'-ACCGCATAAGCGCACGGA-3'            | 59      | 124              | [2]        |
|                                  | R: 5'-CGGGTCCATCTTGTACCGATAAAT-3'      |         |                  |            |
| <i>Prevotella ruminicola</i>     | F: 5'-GCGAAAGTCGGATTAATGCTCTATG-3'     | 59      | 78               | [2]        |
|                                  | R: 5'-CCCATCCTATAGCGGTAAACCTTTG-3'     |         |                  |            |
| <i>Selenomonas ruminantium</i>   | F: 5'-GGCGGGAAGGCAAGTCAGTC-3'          | 60      | 83               | [2]        |
|                                  | R: 5'-CCTCTCCTGCACTCAAGAAAGACAG-3'     |         |                  |            |
| <i>Megasphaera elsdenii</i>      | F: 5'-GACCGAAACTGCGATGCTAGA-3'         | 58      | 129              | [2]        |
|                                  | R: 5'-CGCCTCAGCGTCAGTTGTC-3'           |         |                  |            |
| <i>Veillonella alkalescens</i>   | F: GACGAAAGTCTGACGGAGCA                | 60      | 132              | This study |
|                                  | R: TGCCACCTACGTATTACCGC                |         |                  |            |

**Table S3 The percentage of reads mapped to each enzyme involved in propionate propionate**

| Enzyme      | HF                |                   | LF     |        | SEM <sup>3</sup> | P-value <sup>4</sup> |      |           |
|-------------|-------------------|-------------------|--------|--------|------------------|----------------------|------|-----------|
|             | BF0h <sup>1</sup> | AF4h <sup>2</sup> | BF0h   | AF4h   |                  | Feed                 | Time | Feed*time |
| EC:1.1.1.27 | 0.2186            | 0.2843            | 0.1133 | 0.1169 | 0.0056           | NS                   | NS   | NS        |
| EC:1.3.8.7  | 0.5443            | 0.4514            | 0.7133 | 0.4702 | 0.0044           | NS                   | *    | NS        |
| EC:2.8.3.1  | 0.0078            | 0.0039            | 0.0958 | 0.0674 | 0.0002           | **                   | NS   | NS        |

<sup>1</sup> BF(0), before feeding (0 h); <sup>2</sup> AF(4), after feeding (4 h); <sup>3</sup> SEM for feed × time; <sup>4</sup> NS, not significant ( $P > 0.05$ ); \*, ( $P < 0.05$ ); \*\*, ( $P < 0.01$ ).

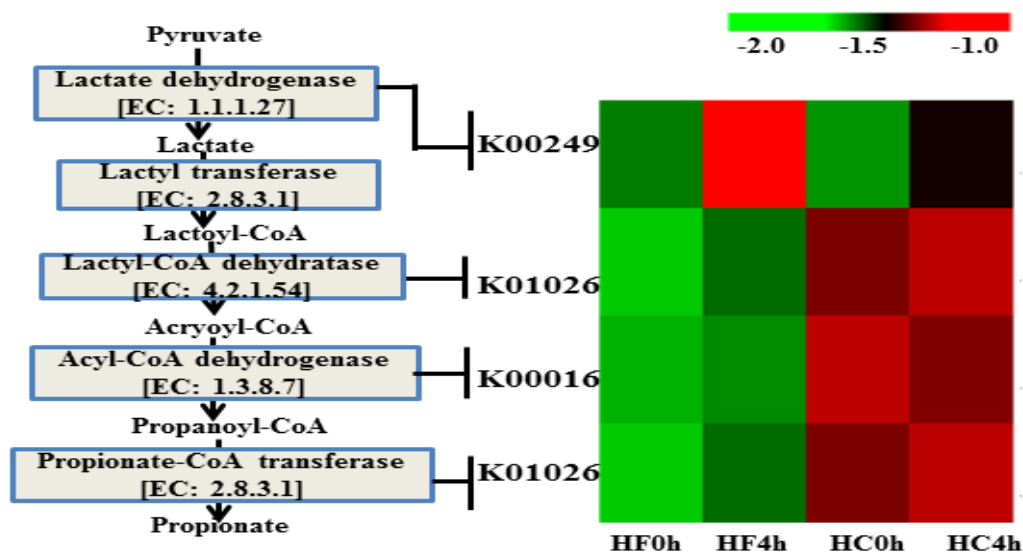

**Figure S1** The metagenomic abundance of key elements of the propionate production pathway. Left pane: the propionate production pathway, showing enzyme classification (EC) numbers. Right pane: heatmap of KEGG orthologues for the EC numbers involved in propionate production (lines connect the heatmap to the propionate production pathway indicating which K0 numbers represent the given enzymes); EC:4.2.1.54 No reference genes for this function were available in the KEGG database. Green and red color indicates low and high abundance, respectively. Computation based on Log10.

#### References:

- [1] McSweeney, C.S., Palmer, B., Bunch, R., Krause, D.O. Effect of the tropical forage calliandra on microbial protein synthesis and ecology in the rumen. *J Appl Microbiol.* 2001, 90(1), 78-88.
- [2] Khafipour, E., Li, S., Plaizier, J.C., Krause, D.O. Rumen microbiome composition determined using two nutritional models of subacute ruminal acidosis. *Appl Environ Microbiol.* 2009, 75, 7115-24.
